# Supplementary material
Source: Springer Nature journal article supplement (https://www.springermedizin.de/resource/supplementary/12939_2013_375_MOESM1_ESM.pdf/9551020)
Supplement: MOESM1 [file 9551020]

## Additional File 1

**Table 7. Relative odds of self-reported racial discrimination in the last 12 months in public settings†, Indigenous Australians aged 15 years and over, 2008-09.‡,§**

|                                          | Model 1  <br>OR (95% CI) | Model 2  <br>OR (95% CI) | Model 3  <br>OR (95% CI) | Model 4  <br>OR (95% CI) |
|------------------------------------------|--------------------------|--------------------------|--------------------------|--------------------------|
| Married                                  | 0.7 (0.6-0.9)*           | 0.8 (0.6-1.0)            | ---                      | 0.9 (0.6-1.1)            |
| Remote area residence                    | 0.8 (0.6-1.1)            | 0.8 (0.6-1.1)            | ---                      | 0.5 (0.3-0.8)**          |
| Highest qualification                    |                          |                          |                          |                          |
| University degree                        | 2.3 (1.3-4.0)**          | 2.8 (1.4-5.2)**          | ---                      | 2.2 (1.2-4.1)*           |
| Diploma/certificate                      | 1.3 (0.9-1.8)            | 1.4 (1.0-2.1)            | ---                      | 1.3 (0.9-1.9)            |
| Year 12 only                             | 0.8 (0.5-1.3)            | 0.9 (0.6-1.5)            | ---                      | 0.9 (0.6-1.5)            |
| Year 10/11 only                          | 1.0                      | 1.0                      | ---                      | 1.0                      |
| <Year 10 only                            | 1.1 (0.8-1.6)            | 1.0 (0.7-1.5)            | ---                      | 1.0 (0.7-1.5)            |
| Labour force status                      |                          |                          |                          |                          |
| Employed                                 | 1.0                      | 1.0                      | ---                      | 1.0                      |
| Unemployed                               | 1.8 (1.2-2.6)**          | 1.7 (1.2-2.6)**          | ---                      | 1.5 (0.9-2.3)            |
| Not in labour force                      | 1.2 (0.9-1.6)            | 1.2 (0.9-1.7)            | ---                      | 1.2 (0.8-1.7)            |
| Home owned or being<br>purchased         | 0.5 (0.4-0.7)***         | 0.4 (0.3-0.6)***         | ---                      | 0.6 (0.4-0.8)**          |
| Equivalised household<br>income quintile |                          |                          |                          |                          |
| 1 (lowest)                               | 1.0                      | 1.0                      | ---                      | 1.0                      |
| 2                                        | 0.8 (0.6-1.2)            | 1.0 (0.7-1.4)            | ---                      | 1.0 (0.7-1.5)            |
| 3                                        | 0.9 (0.6-1.5)            | 1.1 (0.6-1.8)            | ---                      | 1.3 (0.7-2.4)            |
| 4                                        | 0.7 (0.4-1.2)            | 0.9 (0.5-1.6)            | ---                      | 1.1 (0.6-2.0)            |
| 5 (highest)                              | 1.8 (0.7-4.7)            | 2.2 (0.8-6.0)            | ---                      | 2.6 (0.9-7.5)            |

|                                                    |                  |                |                  |                  |
|----------------------------------------------------|------------------|----------------|------------------|------------------|
| Not known/Not stated                               | 0.9 (0.6-1.4)    | 1.1 (0.7-1.6)  | ---              | 1.2 (0.8-1.7)    |
| <b>SEIFA quintile</b>                              |                  |                |                  |                  |
| 1 (most disadvantaged)                             | 1.0              | 1.0            | ---              | 1.0              |
| 2                                                  | 1.3 (0.8-2.0)    | 1.3 (0.8-2.0)  | ---              | 1.5 (0.9-2.4)    |
| 3                                                  | 0.7 (0.5-1.1)    | 0.8 (0.5-1.2)  | ---              | 0.9 (0.5-1.4)    |
| 4                                                  | 1.5 (0.9-2.6)    | 1.7 (1.0-2.9)* | ---              | 1.9 (1.1-3.4)*   |
| 5                                                  | 1.0 (0.4-2.5)    | 1.1 (0.4-2.6)  | ---              | 1.1 (0.4-3.3)    |
| Main language not                                  | 0.9 (0.6-1.4)    | ---            | 0.5 (0.3-0.7)**  | 0.8 (0.5-1.4)    |
| <b>English</b>                                     |                  |                |                  |                  |
| Household members all                              | 2.0 (1.5-2.7)*** | ---            | 1.5 (1.0-2.1)*   | 1.4 (0.9-2.0)    |
| <b>Indigenous</b>                                  |                  |                |                  |                  |
| Identifies with clan, tribal,<br>language group    | 3.4 (2.4-4.6)*** | ---            | 2.2 (1.5-3.2)*** | 2.1 (1.4-3.1)*** |
| Identifies homelands                               | 3.5 (2.5-5.0)*** | ---            | 1.9 (1.2-2.9)**  | 1.9 (1.2-2.9)**  |
| Participated in cultural<br>events, past 12 months | 2.3 (1.6-3.3)*** | ---            | 1.3 (0.8-2.0)    | 1.3 (0.9-2.0)    |
| Taken away from natural<br>family                  | 2.4 (1.7-3.5)*** | ---            | 2.0 (1.4-3.1)**  | 2.0 (1.3-3.0)**  |
| <b>% friends who are</b>                           |                  |                |                  |                  |
| <b>Indigenous</b>                                  |                  |                |                  |                  |
| Most or all                                        | 1.0              | ---            | 1.0              | 1.0              |
| About half                                         | 1.1 (0.8-1.6)    | ---            | 1.2 (0.8-1.8)    | 1.0 (0.7-1.5)    |
| Few                                                | 0.4 (0.3-0.5)*** | ---            | 0.6 (0.4-0.8)**  | 0.5 (0.3-0.7)*** |
| <b>Level of trust</b>                              |                  |                |                  |                  |
| High                                               | 1.0              | ---            | 1.0              | 1.0              |

|        |                  |     |                  |                  |
|--------|------------------|-----|------------------|------------------|
| Medium | 1.6 (1.1-2.1)**  | --- | 1.5 (1.1-2.1)*   | 1.5 (1.1-2.0)*   |
| Low    | 2.5 (1.9-3.4)*** | --- | 2.7 (2.0-3.6)*** | 2.6 (2.0-3.5)*** |

† E.g. on the street, on public transport, or at shopping centres, parks, libraries, sporting events, concerts, restaurants, pubs or clubs [11].

‡ Source: Weighted data from the National Aboriginal and Torres Strait Islander Social Survey 2008-09 confidentialised unit record file (CURF) [11,12].

§ Includes only those with complete data on all variables of interest. Comparison group is those reporting no discrimination in any setting (total N=5,926).

|| Model 1: Adjusted for age group and sex and the variable shown.

Model 2: Adjusted for age group, sex and the socio-demographic variables listed.

Model 3: Adjusted for age group, sex, and the cultural variables listed.

Model 4: Adjusted for age group, sex, and the socio-demographic and cultural variables listed.

\* p < 0.05; \*\* p < 0.01; \*\*\* p < 0.001
